# Supplementary material
Source: publisher figshare collection journal article supplement (https://diabetesjournals.figshare.com/articles/dataset/_/23264624)
Supplement: Supplementary file 2 [file 1]

## Supplementary Material

### Contents

|                                                                                                |    |
|------------------------------------------------------------------------------------------------|----|
| Supplementary Description of Databases.....                                                    | 2  |
| Finland.....                                                                                   | 2  |
| Iceland .....                                                                                  | 2  |
| Norway .....                                                                                   | 3  |
| Sweden .....                                                                                   | 3  |
| Supplementary Table 1. Definition of exclusion criteria .....                                  | 5  |
| Supplementary Table 2. Definition of major congenital malformations (MCMs).....                | 8  |
| Supplementary Table 3. Covariate definitions .....                                             | 10 |
| Supplementary Table 4. Ethical boards providing approval for data use & approval numbers ..... | 14 |
| Supplementary Fig. 1. Distribution of cardiac major congenital malformations .....             | 15 |
| Supplementary Material References.....                                                         | 16 |

## Supplementary Description of Databases

The four Nordic countries, Finland, Iceland, Norway, and Sweden, have a combined population of nearly 22 million and are all cradle-to-grave welfare states with universal and tax-funded healthcare systems. All four countries have similar population-based nationwide health registers that can be linked using the personal identity number unique to all citizens. Reporting to the health registers is mandated by law and is near complete. The key registers for our study are the medical birth registers (i.e., information on live- and stillbirths, mother and child), patient registers (i.e., information on inpatient and outpatient hospital visits, diagnoses and procedures), prescription registers (i.e., information on drugs dispensed at pharmacies) and the cause-of-death registers (i.e., information on the time and cause of death).

Below is a non-exhaustive description of the registers that provided data for our study. A comprehensive review of the Nordic healthcare systems and key registers is available from Laugesen et al. (1).

### Finland

The **Finnish Medical Birth Register** was established in 1987. Reporting is mandatory and registry includes data on all live births and stillbirths of at least 500 grams or 22 completed gestational weeks, as well as data on mothers.

#### **Register of Reimbursed Drug Purchases and Register of Medical Special**

**Reimbursements.** Nationwide databases on reimbursed drug purchases available from 1995. If an individual is entitled to special reimbursement, then drug refill is accompanied with indication for which the prescription was reimbursed.

The **Finnish Patient Register - Care Register for Health Care** contains dates of hospitalizations and visits, all diagnoses (ICD codes) and surgical procedures (NCSP codes) from inpatient stays and outpatient specialist care since 1967/1998 and primary care visits since 2011.

**Finnish Register of Congenital Malformations** contains all malformations (including terminations and stillbirths) identified within one year of birth and some thereafter, which have been validated based on hospital records.

**Register of Primary Health Care Visits** includes data collected from pilot municipalities in 2008–2009. Since 2011 the data collection has covered all outpatient primary health care delivered in Finland.

### Iceland

**Icelandic Medical Birth Register:** Since 1981, mandatory registration of all live- and stillbirths of at least 500 grams or 22 completed gestational weeks.

**Icelandic Prescription Medicines Register:** Since 2003, mandatory registration of all outpatient drugs dispensed in Iceland. Prescription drugs administered to individuals in nursing homes are included from 2011 onwards.

The **Icelandic Patient Register** contains dates of hospitalizations and visits, all diagnoses (ICD codes) and surgical procedures (NCSP codes) from inpatient stays since 1999.

The **Icelandic Cause of Death Register** is a centralized national registry that is maintained by the Directorate of Health and contains mortality data for the Icelandic population, categorized according to the ICD-10 classification system. This includes data on date of death and the main underlying cause of death for each deceased individual.

**Statistics Iceland:** Migration (immigration/emigration), educational attainment.

## Norway

**Medical Birth Registry of Norway:** Since 1967, mandatory registration of all live and stillbirths from 16 completed gestational weeks (12 weeks from 2002, however miscarriages below 16 weeks are incomplete). Includes all pregnancy terminations for fetal anomaly (TOPFA) since 1999.

**Norwegian Prescription Database:** Since January 2004, mandatory registration of all drugs dispensed in Norway. Since 2008, includes ICD-10 diagnosis for prescriptions dispensed for chronic conditions. Before 2008, another reimbursement coding system was used.

**Norwegian Patient Registry:** Dates, diagnoses and procedures from specialists and inpatient care since 2008.

**Norwegian Cause of Death Registry:** Contains data since 1951 on date and cause of death, classified according to ICD-10 since 1996.

**National Education Database:** Established in 1970 and updated every year. Contains information about the level of education of every Norwegian inhabitant who has received education in Norway from the age of 16 years.

**Norwegian Control and Payment of Health Reimbursements Database (KUHR):** The registry contains information on bills from health services, including primary care, which have been reimbursed to patients by the state. Full data are available from 2006.

## Sweden

**The Swedish Medical Birth Register** covers since 1973, over 99% of all livebirths and stillbirths from gestational week 22. Before 1 July 2008, only stillbirths occurring after 28 gestational weeks were included. Data is collected from antenatal care clinics, delivery units and pediatric examination of the infant.

**The Swedish Prescribed Drug Register** was established in July 2005 and contains complete national data on all pharmaceuticals dispensed on prescription. Dispensations are recorded according to the Anatomical Therapeutic Chemical (ATC) classification system, with the date of dispensation, the strength, and quantity. Drugs administered in hospitals or nursing homes with no individual prescription and drugs sold over the counter (OTC) are not included.

**The Swedish Patient Register** contains dates of hospitalizations and visits, all diagnoses (ICD codes) and surgical procedures (NCSP codes) from inpatient stays. The reporting started in 1964 and since 1987, the register has covered all public, inpatient care in Sweden. Since 2001 both public and private care visits are included in the register and since 2002 there is almost full coverage of all outpatient hospital visits.

**Swedish Cause of Death Register:** All deaths registered in Sweden since 1952.

**Longitudinal integrated database for health insurance and labour market studies (LISA):** From Statistics Sweden, contains data on highest achieved education each year.

Supplementary Table 1. Definition of exclusion criteria

| Exclusion criteria                  | Look-back                 | Definition                                                                                                                                                                                                                                                                                                                                                                               | Notes                                                                                                                                                                                                                                                                                                         |
|-------------------------------------|---------------------------|------------------------------------------------------------------------------------------------------------------------------------------------------------------------------------------------------------------------------------------------------------------------------------------------------------------------------------------------------------------------------------------|---------------------------------------------------------------------------------------------------------------------------------------------------------------------------------------------------------------------------------------------------------------------------------------------------------------|
| Assisted reproductive therapy (ART) | n/a                       | <u>MBR (not Iceland):</u><br>Checkbox                                                                                                                                                                                                                                                                                                                                                    | Defined by MBR checkbox, or ICD-10 diagnosis codes, or NCSP procedure codes, or perigestational dispensing of gonadotropin-releasing hormone (GnRH) analogue and gonadotropin and human chorionic gonadotropin (hCG) (2).<br><br>Covariate in sensitivity analysis of mothers with polycystic ovary syndrome. |
|                                     | LMP-90 days to delivery   | <u>MBR, NPR, CDR, KUHR, PHC:</u><br>ICD-10:<br>Z311, Z312, Z313, N98                                                                                                                                                                                                                                                                                                                     |                                                                                                                                                                                                                                                                                                               |
|                                     | LMP-90 days to delivery   | <u>NPR (not Iceland), MBR (not Finland):</u><br>NCSP Finland:<br>LCA30, TLW00, TLW10, TLW11, TLW12, TLW14, TLW20<br><br>NCSP Iceland:<br>LBSF11, LBSF12, LCSA30, LCXA00, LCXA10, LCXA12, LCXA30, LCXA99, LGXA00, LGXA12, LGXA14, LGXA19<br><br>NCSP Norway:<br>LBF11, LBF12, LCA30, LCW30K, LCGX10, LCGX20<br><br>NCSP Sweden:<br>AL015, AL017, DL001, DL002, DL003, DL007, DL008, LCA30 |                                                                                                                                                                                                                                                                                                               |
|                                     | LMP-90 to LMP+97 days     | <u>PDR:</u><br>ATC:<br>Gonadotropin-releasing hormone (GnRH):<br>H01CA02, H01CC01, H01CC02, L02AE01, L02AE03<br>Gonadotropin:<br>G03GA02, G03GA04, G03GA05, G03GA06, G03GA09, G03GA30<br>Human chorionic gonadotropin (hCG):<br>G03GA01, G03GA08                                                                                                                                         |                                                                                                                                                                                                                                                                                                               |
| Polycystic ovary syndrome (PCOS)    | All-available to delivery | <u>MBR, NPR, CDR, KUHR, PHC:</u><br>ICD-10:<br>E282                                                                                                                                                                                                                                                                                                                                      | Inclusion criteria in sensitivity analysis of mothers with polycystic ovary syndrome.                                                                                                                                                                                                                         |
| Type 1 diabetes                     | n/a                       | <u>MBRN:</u><br>Checkbox                                                                                                                                                                                                                                                                                                                                                                 | Defined as perigestational dispensing of insulin and recorded                                                                                                                                                                                                                                                 |

|                                                                                                                  |                                 |                                                                                                                                                                                                                                                                                                                             |                                                                                                                                                                                                                               |
|------------------------------------------------------------------------------------------------------------------|---------------------------------|-----------------------------------------------------------------------------------------------------------------------------------------------------------------------------------------------------------------------------------------------------------------------------------------------------------------------------|-------------------------------------------------------------------------------------------------------------------------------------------------------------------------------------------------------------------------------|
|                                                                                                                  | All-available to delivery       | <u>MBR, NPR, CDR, KUHR, PHC:</u><br>ICD-10:<br>E10, O240                                                                                                                                                                                                                                                                    | type 1 diabetes in either MBRN checkbox or as ICD-10 diagnosis code.                                                                                                                                                          |
|                                                                                                                  | LMP-90 to LMP+97 days           | <u>PDR:</u><br>ATC:<br>A10A (insulin and analogues)                                                                                                                                                                                                                                                                         | Covariate in sensitivity analysis of mothers with polycystic ovary syndrome.                                                                                                                                                  |
| Type 2 diabetes                                                                                                  | n/a                             | <u>MBRN:</u><br>Checkbox                                                                                                                                                                                                                                                                                                    | Defined as recorded type 2 diabetes in either MBRN checkbox or as ICD-10 diagnosis code.                                                                                                                                      |
|                                                                                                                  | All-available to delivery       | <u>MBR, NPR, CDR, KUHR, PHC:</u><br>ICD-10:<br>E11, O241                                                                                                                                                                                                                                                                    | Only used as inclusion criterion in sensitivity analyses restricted to mothers with a diagnosis of type 2 diabetes, and as exclusion criteria in sensitivity analysis of mothers with polycystic ovary syndrome.              |
| Preexisting diabetes other than type 1 diabetes or type 2 diabetes                                               | All-available to delivery       | <u>MBR, NPR, CDR, KUHR, PHC:</u><br>ICD-10:<br>E12, E13, O242                                                                                                                                                                                                                                                               |                                                                                                                                                                                                                               |
| Known teratogenic drugs                                                                                          | LMP-90 to LMP+97 days           | <u>PDR:</u><br>ATC:<br>Antineoplastic agents:<br>L01<br>Isotretinoin: D10BA01, D10AD04, D10AD54<br>Misoprostol: A02BB01, G02AD06, M01AE56, M01AB55<br>Systemic retinoids for psoriasis, dermatitis: D05BB, D11AH04<br>Thalidomide: L04AX02<br>Valproic acid: N03AG01<br>Warfarin: B01AA03<br>Methotrexate: L01BA01, L04AX03 | Defined as any of the listed drugs.                                                                                                                                                                                           |
| Other antidiabetics than metformin or insulin                                                                    | LMP-90 to LMP+97 days           | <u>PDR:</u><br>ATC:<br>A10B (except A10BA02), A10X                                                                                                                                                                                                                                                                          |                                                                                                                                                                                                                               |
| Chromosomal/genetic anomaly or teratogenic infection (i.e., rubella, cytomegalovirus and toxoplasmosis) in child | Delivery to delivery + ~ 1 year | <u>MBR, NPR, CDR:</u><br>ICD-10:<br>D821, P350, P351, P371, (Q6190), Q751, Q754, Q87, Q90-Q99<br>Except Q95<br><u>Finnish Register of Congenital Anomalies:</u><br>ICD-9A:<br>27911, 75581, 75604, 758, 7598, 7710, 7711, 77121<br>Except 7584, 75989                                                                       | Codes in parentheses under ICD-10 are minor anomalies coded according to British Paediatric Association (BPA) modification of ICD that cannot be identified with standard ICD-10.<br><br>See ESM Table 2 for further details. |

ATC = Anatomical Therapeutic Chemical Classification System, CDR = Cause of Death Register in Norway and Sweden, ICD-10 = International Classification of Diseases 10th Revision, KUHR = Norwegian Control and

Payment of Health Reimbursements Database, LMP = last menstrual period, MBR = Medical Birth Register, MBRN = Medical Birth Registry of Norway, NCSP = Nordic Medico-Statistical Committee (NOMESCO) Classification of Surgical Procedures, NPR = National Patient Register, PDR = Prescribed Drug Register, PHC = Register of Primary Health Care Visits

## Supplementary Table 2. Definition of major congenital malformations (MCMs)

Based on EUROCAT (European network of population-based registries for the epidemiological surveillance of congenital anomalies) Guide 1.4, version 01/12/2020.(3)

| Subgroup               | ICD-10 in MBR, NPR, CDR in Iceland, Norway, Sweden*                                                                                                                                                                                                                                                                     | ICD-9A in Finnish Register of Congenital Anomalies <sup>†</sup>                                                                                                                                                                                                                                                                                                             |
|------------------------|-------------------------------------------------------------------------------------------------------------------------------------------------------------------------------------------------------------------------------------------------------------------------------------------------------------------------|-----------------------------------------------------------------------------------------------------------------------------------------------------------------------------------------------------------------------------------------------------------------------------------------------------------------------------------------------------------------------------|
| 1. Nervous system      | Q00-Q07<br>Except<br>(Q0461, Q0780, Q0782)                                                                                                                                                                                                                                                                              | 740-742<br>Except<br>74280                                                                                                                                                                                                                                                                                                                                                  |
| 2. Eye                 | Q10-Q15<br>Except<br>Q101-Q103, Q105, Q135                                                                                                                                                                                                                                                                              | 743<br>Except<br>74345, 74361-74363, 74365                                                                                                                                                                                                                                                                                                                                  |
| 3. Ear, face, and neck | Q16-Q18<br>Except<br>Q170-Q175, Q179, Q180-Q182,<br>Q184-Q187, (Q1880), Q189                                                                                                                                                                                                                                            | 744<br>Except<br>7441, 74420-74424, 74430, 7444,<br>74480-74483, 7449                                                                                                                                                                                                                                                                                                       |
| 4. Cardiac             | Q20-Q26<br>Except<br>(Q2111), Q246, Q250 and preterm,<br>(Q2541), Q256 and preterm, Q261                                                                                                                                                                                                                                | 745, 746, 7470-7474<br>Except<br>74550, 74687, 7470 and preterm<br>74723, 747325 and preterm, 74741,<br>74749                                                                                                                                                                                                                                                               |
| 5. Respiratory         | Q30, Q32-Q34<br>Except<br>Q301-Q309, Q320, Q322, (Q3300),<br>Q331, Q336                                                                                                                                                                                                                                                 | 748<br>Except<br>7481, 7482-7483 (other), 74840, 74851,<br>74859, 74862                                                                                                                                                                                                                                                                                                     |
| 6. Oro-facial clefts   | Q35-Q37<br>Except Q357, or if occurring with<br>Q00, Q042                                                                                                                                                                                                                                                               | 749<br>Except 74908, or if occurring with 740,<br>74226                                                                                                                                                                                                                                                                                                                     |
| 7. Digestive system    | Q38-Q45, Q790<br>Except<br>Q381, Q382, (Q3850), Q400,<br>Q401, (Q4021), Q430, (Q4320,<br>Q4381, Q4382), Q444, (Q4583)                                                                                                                                                                                                   | 750, 751, 7566<br>Except<br>75000, 75011-75013, 75024, 75050,<br>75051, 7506, 75101, 7513, 75166                                                                                                                                                                                                                                                                            |
| 8. Abdominal wall      | Q792, Q793, Q795                                                                                                                                                                                                                                                                                                        | 75670, 75671, 75679                                                                                                                                                                                                                                                                                                                                                         |
| 9. Genital             | Q50-Q56<br>Except<br>Q501 (Q5010, Q5011), Q502,<br>Q505, Q523, Q525, Q527, Q53,<br>Q544, (Q5520, Q5521)                                                                                                                                                                                                                 | 752<br>Except<br>75208, 75211, 75243, 75244, 7525,<br>75261 (urinary), 752621, 75282, 75286                                                                                                                                                                                                                                                                                 |
| 10. Urinary            | Q60-Q64, Q794<br>Except<br>Q610, (Q6190 genetic) Q627,<br>Q633                                                                                                                                                                                                                                                          | 75261, 753, 75672<br>Except<br>75310, 75334, 753485                                                                                                                                                                                                                                                                                                                         |
| 11. Limb               | Q66-Q74<br>Except<br>Q661-Q669, Q670-Q678, Q680,<br>(Q6810, Q6821) Q683, Q684,<br>Q685, (Q7400)                                                                                                                                                                                                                         | 754-755<br>Except<br>7540-7542 (other), 7543, 75440-75443,<br>75451-75453, 75459, 7546, 7547,<br>75480-75482, 755525, 755606, 755616,<br>755645, 755646, 75566, 75581 (genetic)                                                                                                                                                                                             |
| 12. Other              | Q27, Q28, Q31, Q75-Q85, Q89<br>Except<br>Q270, Q314, Q751 (genetic),<br>Q752, Q753, Q754 (genetic),<br>Q760, (Q7643, Q7660, Q7662),<br>Q765, (Q7671), Q790 (digestive),<br>Q792 (abdominal wall), Q793<br>(abdominal wall), Q794 (urinary),<br>Q795 (abdominal wall), Q825,<br>Q828, Q833, Q845, Q846,<br>(Q8911), Q899 | 7475-7479, 7482-7483, 7540-7542, 756,<br>757, 759<br>Except<br>7475, 74836, 7540, 7541, 75421, 75604<br>(genetic), 756085, 75610, 7562, 75630,<br>75632, 75633, 7566 (digestive), 75670<br>(abdominal wall), 75671 (abdominal<br>wall), 75672 (urinary), 75679<br>(abdominal wall), 75686, 7572, 7573,<br>75751, 75758, 75765, 75902, 75904,<br>75911, 7598 (genetic), 7599 |



|                                                         |                                                                                                                                                   |                                                                         |
|---------------------------------------------------------|---------------------------------------------------------------------------------------------------------------------------------------------------|-------------------------------------------------------------------------|
| X. Chromosomal/genetic anomaly or teratogenic infection | D821, P350, P351, P371, (Q6190), Q751, Q754, Q87, Q90-Q99<br>Except Q95                                                                           | 27911, 75581, 75604, 758, 7598, 7710, 7711, 77121<br>Except 7584, 75989 |
| Any MCM                                                 | Any of the above subgroups (1-12), excluding those in subgroup X                                                                                  |                                                                         |
| Multiple MCMs                                           | Follows the 22-step process, outlined in EUROCAT guide 1.4 (Last update version 01/12/2020), section 3.4 (pages 99-104) to remove known sequences |                                                                         |

\* Codes in parentheses under ICD-10 (International Classification of Diseases 10th Revision) are minor anomalies coded according to British Paediatric Association (BPA) modification of ICD that cannot be identified with standard ICD-10. For Iceland, Norway, and Sweden, we required at least two diagnosis codes from the same subgroup to be recorded on separate visit dates if the MCM was only diagnosed in outpatient specialist care to increase diagnostic validity. For Iceland, the birthday was assumed to be day 15 of the month of birth since the exact day of birth was not available.

† Finland uses ICD-9A [International Classification of Diseases 9th Revision, A=Atlanta or Metropolitan Atlanta Congenital Defects Program (MACDP) which is almost identical to BPA version], rather than standard ICD-9 for the Finnish Register of Congenital Malformations. For Finland, we only considered validated diagnoses from the Finnish Register of Congenital Malformations.

Supplementary Table 3. Covariate definitions

| Covariate                                         | Look-back | Definition                                                                                                      | Categories                                                                              | Notes                                                                                                                                                    |
|---------------------------------------------------|-----------|-----------------------------------------------------------------------------------------------------------------|-----------------------------------------------------------------------------------------|----------------------------------------------------------------------------------------------------------------------------------------------------------|
| Demographics                                      |           |                                                                                                                 |                                                                                         |                                                                                                                                                          |
| Country of delivery                               | n/a       |                                                                                                                 | Finland<br>Iceland<br>Norway<br>Sweden                                                  |                                                                                                                                                          |
| Calendar year of delivery                         | n/a       | As recorded in MBR                                                                                              | 1996-2000<br>2001-2005<br>2006-2010<br>2011-2015<br>2016-2018                           |                                                                                                                                                          |
| Maternal age at delivery                          | n/a       | As recorded in MBR                                                                                              | <25<br>25-29<br>30-34<br>35-39<br>≥40                                                   |                                                                                                                                                          |
| Parity                                            | n/a       | As recorded in MBR                                                                                              | 0<br>1<br>≥2                                                                            | Only for descriptive purposes                                                                                                                            |
| Maternal education                                | n/a       | Highest achieved education in year of delivery                                                                  | Compulsory<br>Pre-university<br>University<br>Missing                                   | Finland: n/a                                                                                                                                             |
| Relationship status/<br>cohabitation with partner | n/a       | As recorded in MBR                                                                                              | Yes<br>No<br>Missing                                                                    |                                                                                                                                                          |
| Maternal country of birth                         | n/a       | As recorded in MBR or population register                                                                       | Nordic<br>Non-Nordic<br>Missing                                                         | Finland: defined as Finnish, non-Finnish citizenship                                                                                                     |
| Health factors                                    |           |                                                                                                                 |                                                                                         |                                                                                                                                                          |
| Body Mass Index (BMI) in early pregnancy          | n/a       | As recorded in MBR, or calculated from maternal weight and height at first antenatal visit (kg/m <sup>2</sup> ) | Underweight <18.5<br>Normal 18.5 to <25<br>Overweight 25 to <30<br>Obese ≥30<br>Missing | Finland: partly available since 2004 and from all delivery hospitals since October 2005<br>Iceland: available since 2012<br>Norway: available since 2006 |
| Smoking, early pregnancy                          | n/a       | As recorded in MBR                                                                                              | Yes<br>No<br>Missing                                                                    | Iceland: n/a                                                                                                                                             |
| Folic acid use before and/or during pregnancy     | n/a       | <u>MBR:</u><br>Norway: checkbox<br>Sweden: based on self-reported folate use                                    | Yes<br>No<br>Missing                                                                    | Finland: n/a<br>Sweden: use before pregnancy n/a                                                                                                         |

|                                                        |                          |                                                                                                                                                                                                                                                                                                                                 |           |  |
|--------------------------------------------------------|--------------------------|---------------------------------------------------------------------------------------------------------------------------------------------------------------------------------------------------------------------------------------------------------------------------------------------------------------------------------|-----------|--|
|                                                        |                          | <u>PDR in Iceland:</u><br>ATC: B03BB01                                                                                                                                                                                                                                                                                          |           |  |
| Comorbidities                                          |                          |                                                                                                                                                                                                                                                                                                                                 |           |  |
| Skin infections, incl. candidiasis of vulva and vagina | LMP-365 to LMP+97 days   | <u>MBR, NPR, KUHR, PHC:</u> ICD-10: A46, B35-B37, L00-L08<br><u>KUHR, PHC:</u> ICPC-2: S09, S10, S74-S76, X72<br><u>PDR in Norway (reimbursement):</u> ICD-10: A46, B35-B37, L00-L08<br>ICPC-2: S09, S10, S74-S76, X72                                                                                                          | Yes<br>No |  |
| Diabetic complications                                 | LMP-365 days to delivery | <u>MBR, NPR, CDR, KUHR, PHC:</u> ICD-10: E110-E118, E160, H280, H360, G590, G632, G730, G990, I792, M142, M146, N083<br><u>KUHR, PHC:</u> ICPC-2: F83, F92, N94, T87<br><u>PDR in Norway (reimbursement):</u> ICD-10: E110-E118, E160, H280, H360, G590, G632, G730, G990, I792, M142, M146, N083<br>ICPC-2: F83, F92, N94, T87 | Yes<br>No |  |
| Chronic hypertension                                   | LMP-365 days to delivery | <u>MBR, NPR, CDR, KUHR, PHC:</u> ICD-10: I10-I15, O10, 011<br><u>MBRN:</u> checkbox<br><u>KUHR, PHC:</u> ICPC-2: K86, K87<br><u>PDR in Norway (reimbursement):</u> ICD-10: I10-I15, O10, 011; ICPC-2: K86, K87<br><u>PDR in Finland (special reimbursement):</u> 205                                                            | Yes<br>No |  |
| Cardiovascular disease                                 | LMP-365 days to delivery | <u>MBR, NPR, CDR, KUHR, PHC:</u>                                                                                                                                                                                                                                                                                                | Yes<br>No |  |

|                                                                                                |                          |                                                                                                                                                                                                                                                                          |           |  |
|------------------------------------------------------------------------------------------------|--------------------------|--------------------------------------------------------------------------------------------------------------------------------------------------------------------------------------------------------------------------------------------------------------------------|-----------|--|
|                                                                                                |                          | ICD-10: I20-I25, I48, I50, I61-I66, I691-I694, I70-I72, I739, I74<br><u>KUHR, PHC:</u><br>ICPC-2: K74-K78<br><u>PDR in Norway (reimbursement):</u><br>ICD-10: I20-I25, I48, I50, I61-I66, I691-I694, I70-I72, I739, I74<br>ICPC-2: K74-K78                               |           |  |
| Epilepsy                                                                                       | LMP-365 days to delivery | <u>MBR, NPR, CDR, KUHR, PHC:</u><br>ICD-10: G40, G41<br><u>MBRN:</u><br>checkbox<br><u>KUHR, PHC:</u><br>ICPC-2: N88<br><u>PDR in Norway (reimbursement):</u><br>ICD-10: G40<br>ICPC-2: N88<br><u>PDR in Finland (special reimbursement):</u><br>111, 181, 182, 183, 199 | Yes<br>No |  |
| Severe mental illness                                                                          | LMP-365 days to delivery | <u>MBR, NPR, CDR, KUHR, PHC:</u><br>ICD-10: F20-F31, F323, F333<br><u>KUHR, PHC:</u><br>ICPC-2: P72, P98<br><u>PDR in Norway (reimbursement):</u><br>ICD-10: F20-F31, F322, F333<br>ICPC-2: P72, P98                                                                     | Yes<br>No |  |
| <b>Suspected teratogenic drugs</b>                                                             |                          |                                                                                                                                                                                                                                                                          |           |  |
| Drugs acting on the renin-angiotensin system, including ACE inhibitors, ARBs, renin inhibitors | LMP-90 to LMP+97 days    | <u>PDR:</u><br>ATC: C09                                                                                                                                                                                                                                                  | Yes<br>No |  |
| Antithyroid drugs                                                                              | LMP-90 to LMP+97 days    | <u>PDR:</u><br>ATC: H03B                                                                                                                                                                                                                                                 | Yes<br>No |  |
| Immunosuppressive drugs                                                                        | LMP-90 to LMP+97 days    | <u>PDR:</u><br>ATC: L04AA06, L04AA13, L04AA31                                                                                                                                                                                                                            | Yes<br>No |  |

|                           |                       |                                                            |           |                                         |
|---------------------------|-----------------------|------------------------------------------------------------|-----------|-----------------------------------------|
| Thalidomide-related drugs | LMP-90 to LMP+97 days | <u>PDR:</u><br>ATC: L04AX04, L04AX06                       | Yes<br>No |                                         |
| Ergot alkaloids           | LMP-90 to LMP+97 days | <u>PDR:</u><br>ATC: N02C                                   | Yes<br>No |                                         |
| Antiseizure medications   | LMP-90 to LMP+97 days | <u>PDR:</u><br>ATC: N03A excluding N03AG01 (valproic acid) | Yes<br>No | Valproic acid is an exclusion criterion |
| Lithium                   | LMP-90 to LMP+97 days | <u>PDR:</u><br>ATC: N05AN01                                | Yes<br>No |                                         |
| Other co-medications      |                       |                                                            |           |                                         |
| Other antihypertensives   | LMP-90 to LMP+97 days | <u>PDR:</u><br>ATC: C02, C03, C07, C08, C09                | Yes<br>No |                                         |
| Lipid modifying agents    | LMP-90 to LMP+97 days | <u>PDR:</u><br>ATC: C10                                    | Yes<br>No |                                         |
| Glucocorticoids           | LMP-90 to LMP+97 days | <u>PDR:</u><br>ATC: H02AB                                  | Yes<br>No |                                         |

ATC = Anatomical Therapeutic Chemical Classification System, CDR = Cause of Death Register in Norway and Sweden, ICD-10 = International Classification of Diseases 10th Revision, ICPC-2 = International Classification of Primary Care 2nd Edition, KUHR = Norwegian Control and Payment of Health Reimbursements Database, LMP = last menstrual period, MBR = Medical Birth Register, MBRN = Medical Birth Registry of Norway, NPR = National Patient Register, PHC = Finnish Register of Primary Health Care Visits, PDR = Prescribed Drug Register

Supplementary Table 4. Ethical boards providing approval for data use & approval numbers

| Country | Ethical Board                                                       | Approval Number                                                     |
|---------|---------------------------------------------------------------------|---------------------------------------------------------------------|
| Finland | No Ethical Board approval needed.                                   | THL/1551/6.02.00/2018,<br>THL/1673/5.05.00/2019, Kela 117/522/2019. |
| Iceland | National Bioethics Committee                                        | VSNb2018060017/03.01                                                |
| Norway  | Regional Committee for Medical Research<br>Ethics South/East Norway | 2017/2546/REC South-East                                            |
|         | The Norwegian Data Inspectorate in Norway                           | 17/02068/Norwegian Data Inspectorate                                |
| Sweden  | Swedish Ethical Review Authority<br>(Etikprövningsmyndigheten)      | dnr 2015/1826-31/2, 2017/2238-32,<br>2018/1790-32, 2018/2211-32     |

Supplementary Fig. 1. Distribution of cardiac major congenital malformations

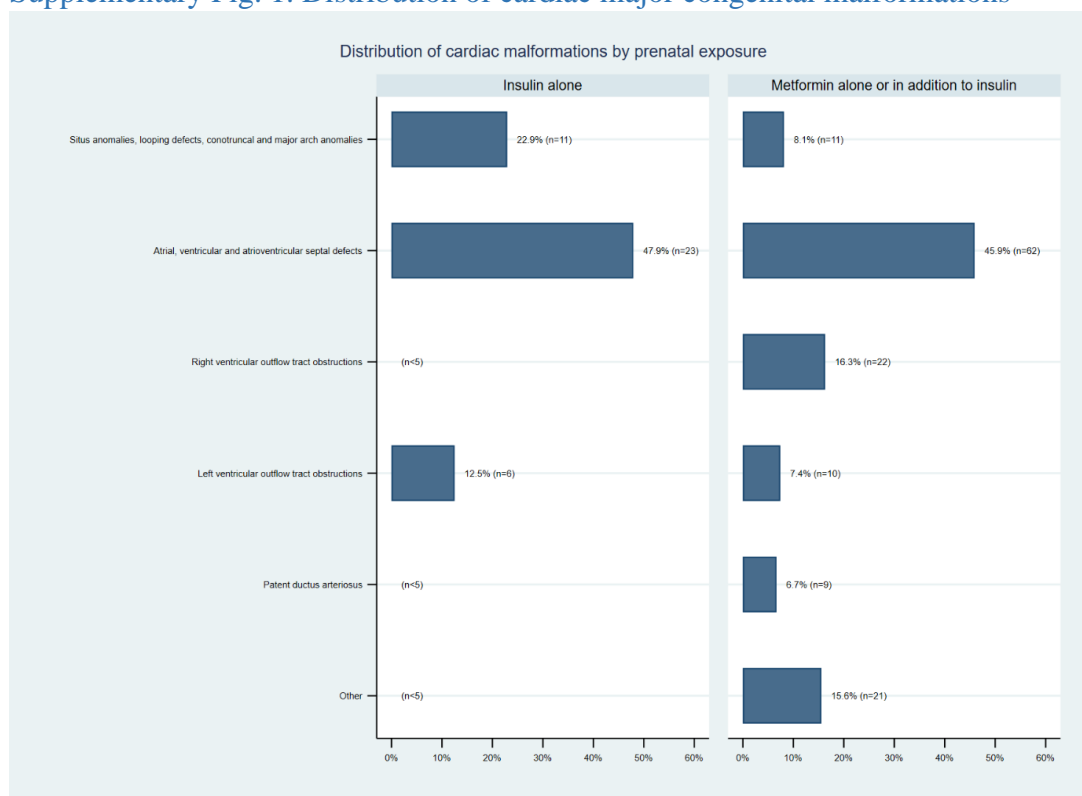

Distribution of cardiac major congenital malformations in infants by prenatal exposure to metformin alone or in addition to insulin or to insulin alone.

### Supplementary Material References

1. Laugesen K, Ludvigsson JF, Schmidt M, Gissler M, Valdimarsdottir UA, Lunde A, et al. Nordic Health Registry-Based Research: A Review of Health Care Systems and Key Registries. *Clin Epidemiol*. 2021 Jul 19;13:533–54.
2. Reigstad MM, Storeng R, Furu K, Bakken IJ, Engeland A, Larsen IK. Validation of Assisted Reproductive Technology in the Medical Birth Registry of Norway Versus the Norwegian Prescription Database. *Epidemiology*. 2020 Sep;31(5):681–6.
3. European Commission. Guidelines for data registration. Accessed March 18, 2022. Available from: [https://eu-rd-platform.jrc.ec.europa.eu/eurocat/data-collection/guidelines-for-data-registration\\_en](https://eu-rd-platform.jrc.ec.europa.eu/eurocat/data-collection/guidelines-for-data-registration_en)
